# Supplementary material
Source: PubMed Central journal article supplement (PMC6641524)
Supplement: ao7b02085_si_001.pdf [file ao7b02085_si_001.pdf]

# Impact of oxygen functional groups on reduced graphene oxide based sensors for ammonia and toluene detection at room temperature

Cherukutty Ramakrishnan Minitha<sup>a</sup>, Velunair Sukumaran Anithaa<sup>b</sup>, Vijayakumar Subramaniam<sup>c</sup>,  
Ramasamy Thangavelu Rajendra Kumar<sup>a,d\*</sup>

<sup>a</sup>Advanced Materials and Devices Laboratory (AMDL), Department of Physics, Bharathiar University, Coimbatore - 641 046, India.

<sup>b</sup>Department of Physics, Bharathiar University, Coimbatore - 641 046, India.

<sup>c</sup>Department of Medical Physics, Bharathiar University, Coimbatore - 641 046, India.

<sup>d</sup>Department of Nanoscience and technology, Bharathiar University, Coimbatore - 641 046, India.

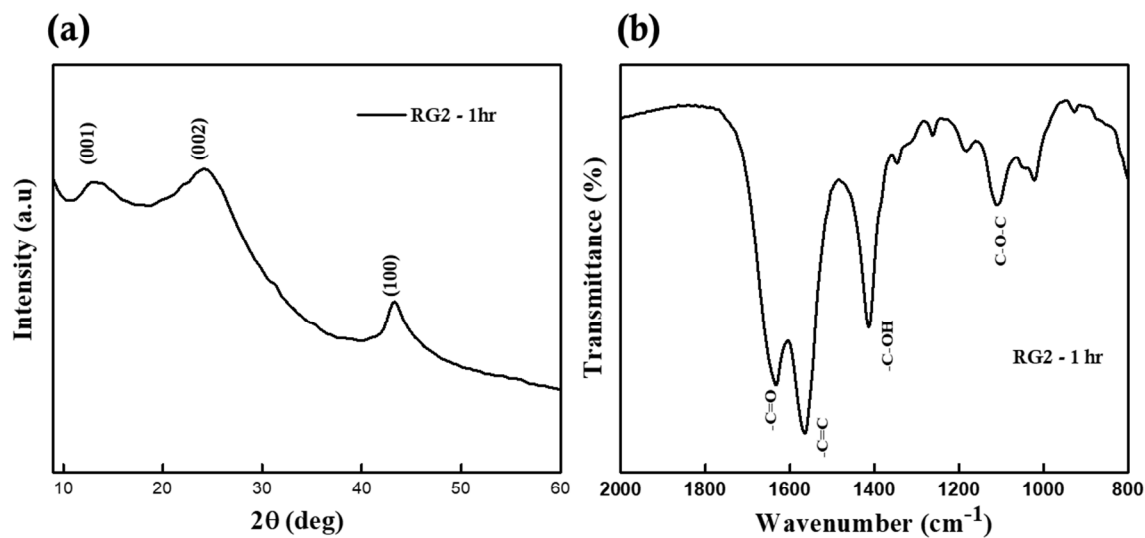

**Figure. S1:** (a) XRD and (b) FTIR spectra of RG2 (1 hour)

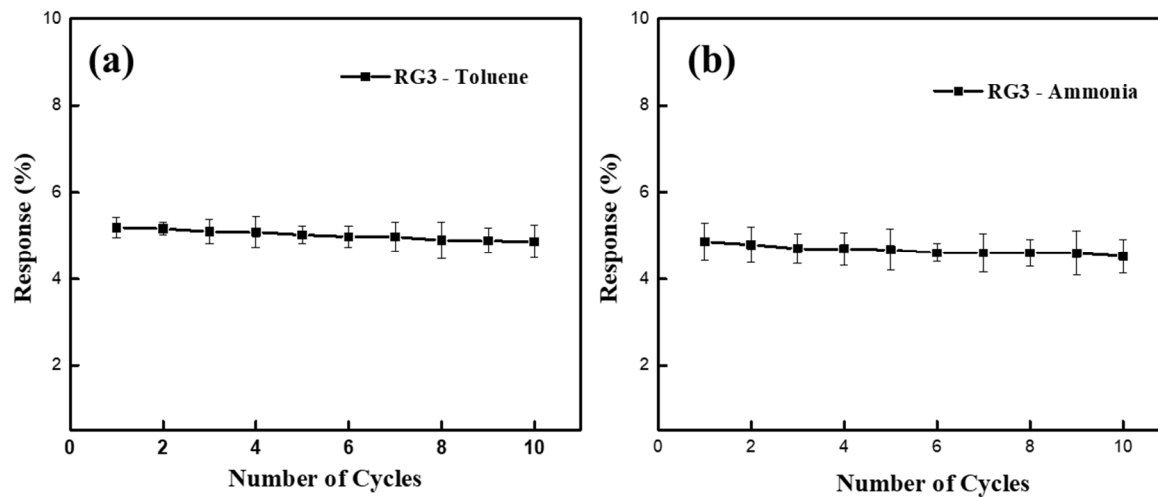

**Figure S2:** The stability of RG3 sensor with 10 repetitive cycles in the presence of 40 % RH (a) Toluene and (b) Ammonia. Error bars represent standard deviations (n=3)

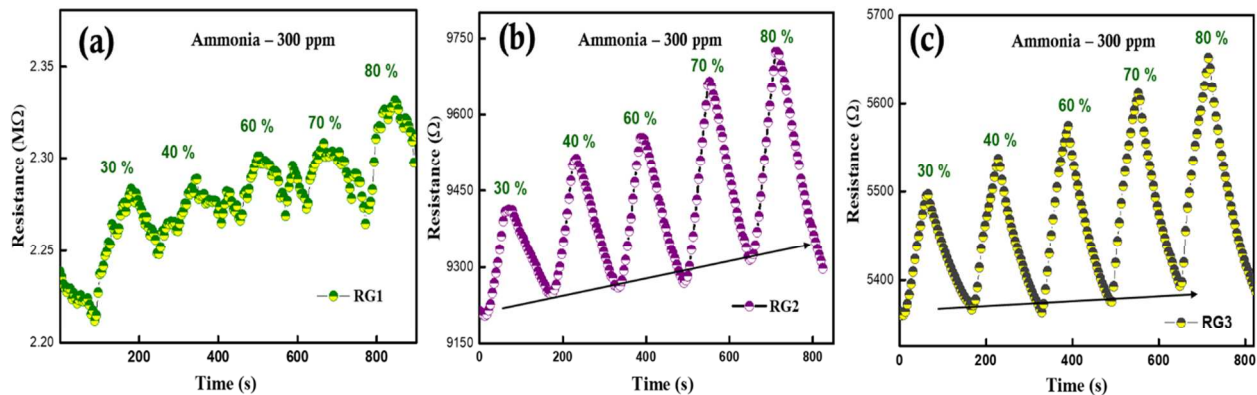

**Figure S3:** Response of the rGO based sensor for detection of 300 ppm of Ammonia at different relative humidity (30 % to 80 %) (a) RG1, (b) RG2 and (c) RG3 respectively

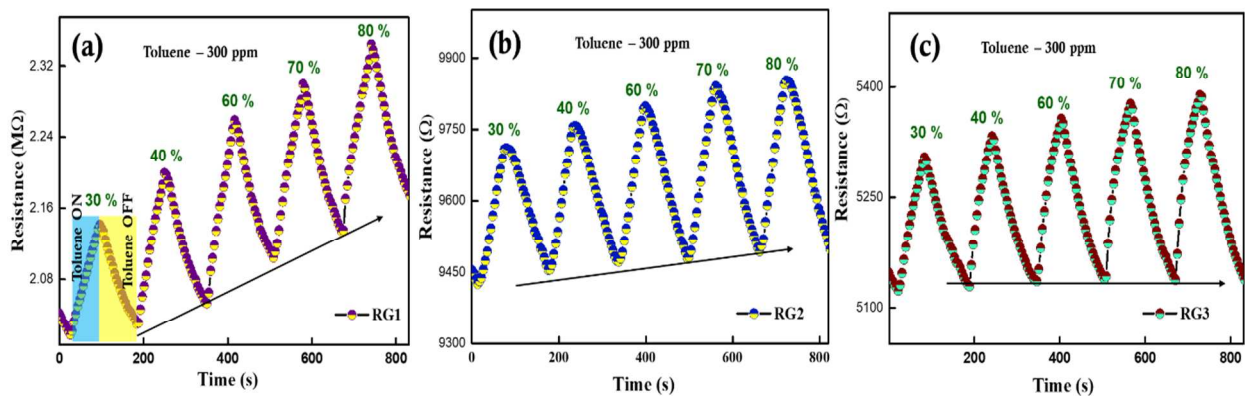

**Figure S4 :** Response of the rGO based sensor for detection of 300 ppm of Toluene at different relative humidity (30 % to 80 %) (a) RG1, (b) RG2 and (c) RG3 respectively.
